# Supplementary material for: Custom Workflow for the Confident Identification of Sulfotyrosine-Containing Peptides and Their Discrimination from Phosphopeptides
Source: PubMed Central journal article supplement (PMC10696596; doi:10.1021/acs.jproteome.3c00425), 2023-11-08
Supplement: pr3c00425_si_001.pdf [file pr3c00425_si_001.pdf]

## Supporting Information

# Custom workflow for the confident identification of sulfotyrosine-containing peptides and their discrimination from phosphopeptides

Leonard A. Daly<sup>1,2</sup>, Dominic P. Byrne<sup>2</sup>, Simon Perkins<sup>3</sup>, Philip J Brownridge<sup>1</sup>, Euan McDonnell<sup>2,3</sup>, Andrew R. Jones<sup>2,3</sup>, Patrick A. Eyers<sup>2</sup>, and Claire E. Eyers<sup>1,2\*</sup>.

<sup>1</sup> Centre for Proteome Research, Institute of Systems, Molecular & Integrative Biology, University of Liverpool, Crown Street, Liverpool, L69 7ZB, U.K.

<sup>2</sup> Department of Biochemistry, Cell & Systems Biology, Institute of Systems, Molecular & Integrative Biology, University of Liverpool, Crown Street, Liverpool L69 7ZB, U.K.

<sup>3</sup> Computational Biology Facility, Institute of Systems, Molecular & Integrative Biology, University of Liverpool, Crown Street, Liverpool, L69 7ZB, U.K.

\*Corresponding author: Claire E. Eyers (ceyers@liverpool.ac.uk).

### Table of Contents

**Figure S1.** Charge state distribution of our standard panel of peptides in an unmodified, phosphorylated, or sulfated state. (PDF)

**Figure S2.** Sulfated peptides but not phosphopeptides yield extensive precursor ion loss of 80 amu following 10% NCE HCD fragmentation. (PDF)

**Figure S3.** Isoelectric point versus *m/z* distribution of the peptides identified from either the total DDA unenriched HEK-293 secretome sample, or following enrichment with TiO<sub>2</sub> or Zr<sup>4+</sup>-IMAC. (PDF)

**Figure S4.** Characteristics of precursor ions that triggered 32% NCE HCD following precursor ion NL at 10% NCE HCD following secretome peptide enrichment with either BioResyn Zr<sup>4+</sup>-IMAC (BRzr) or TiO<sub>2</sub>. (PDF)

**Figure S5.** Distinguishing duplicated scan PSMs. (PDF)

**Figure S6.** Properties of peptides from enriched HEK293 secretome. (PDF)

**Figure S7.** Sequence conservation of a biochemically/MS-validated sulfated Tyr residue that lies C-terminal to an acidic motif in the C-terminus of human (h) Heparan Sulfate 6OST1, 2 and 3. (PDF)

**Table S1.** Synthesized peptide standards. (XLSX)

**Table S2.** Gene ontology analysis of DDA total protein identifications. (XLSX)

**Table S3.** HEK293 secretome sulfopeptide identification and supporting data. (XLSX)

**Table S4.** Proteins and peptides identified following *in vitro* sulfation of immunoprecipitated Heparan Sulfate 6-O-Sulfotransferases (H6STs) with TPST1/2. (XLSX)

**Table S5.** Proteins and sulfopeptides identified following *in vitro* sulfation of immunoprecipitated H6ST1, H6ST2 or H6ST3 with TPST1/2. (PDF)

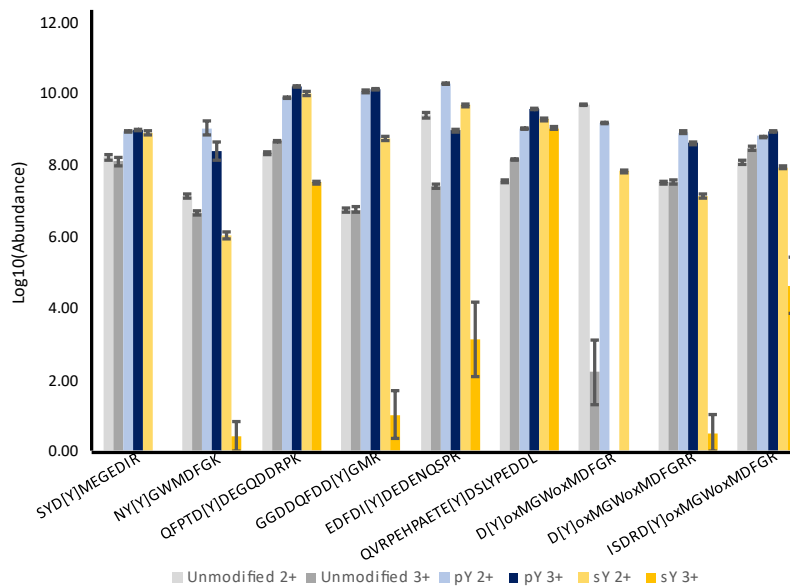

**Figure S1. Charge state distribution of our standard panel of peptides in an unmodified, phosphorylated, or sulfated state.** The most intense PSM (determined from the mgf file) for each sY and pY peptide at different charges (including oxidised methionine variants) were selected for quantitation (14 peptide ions). The absolute abundance (log10) of the precursor ion (check), precursor ion -80 Da (block), or precursor ion -98 Da (dotted) is presented. sY-containing peptides in yellow; pY peptides in blue. Modification site denoted by [Y], ox = oxidized residue. Error bars represent SE from N = 10 replicates.

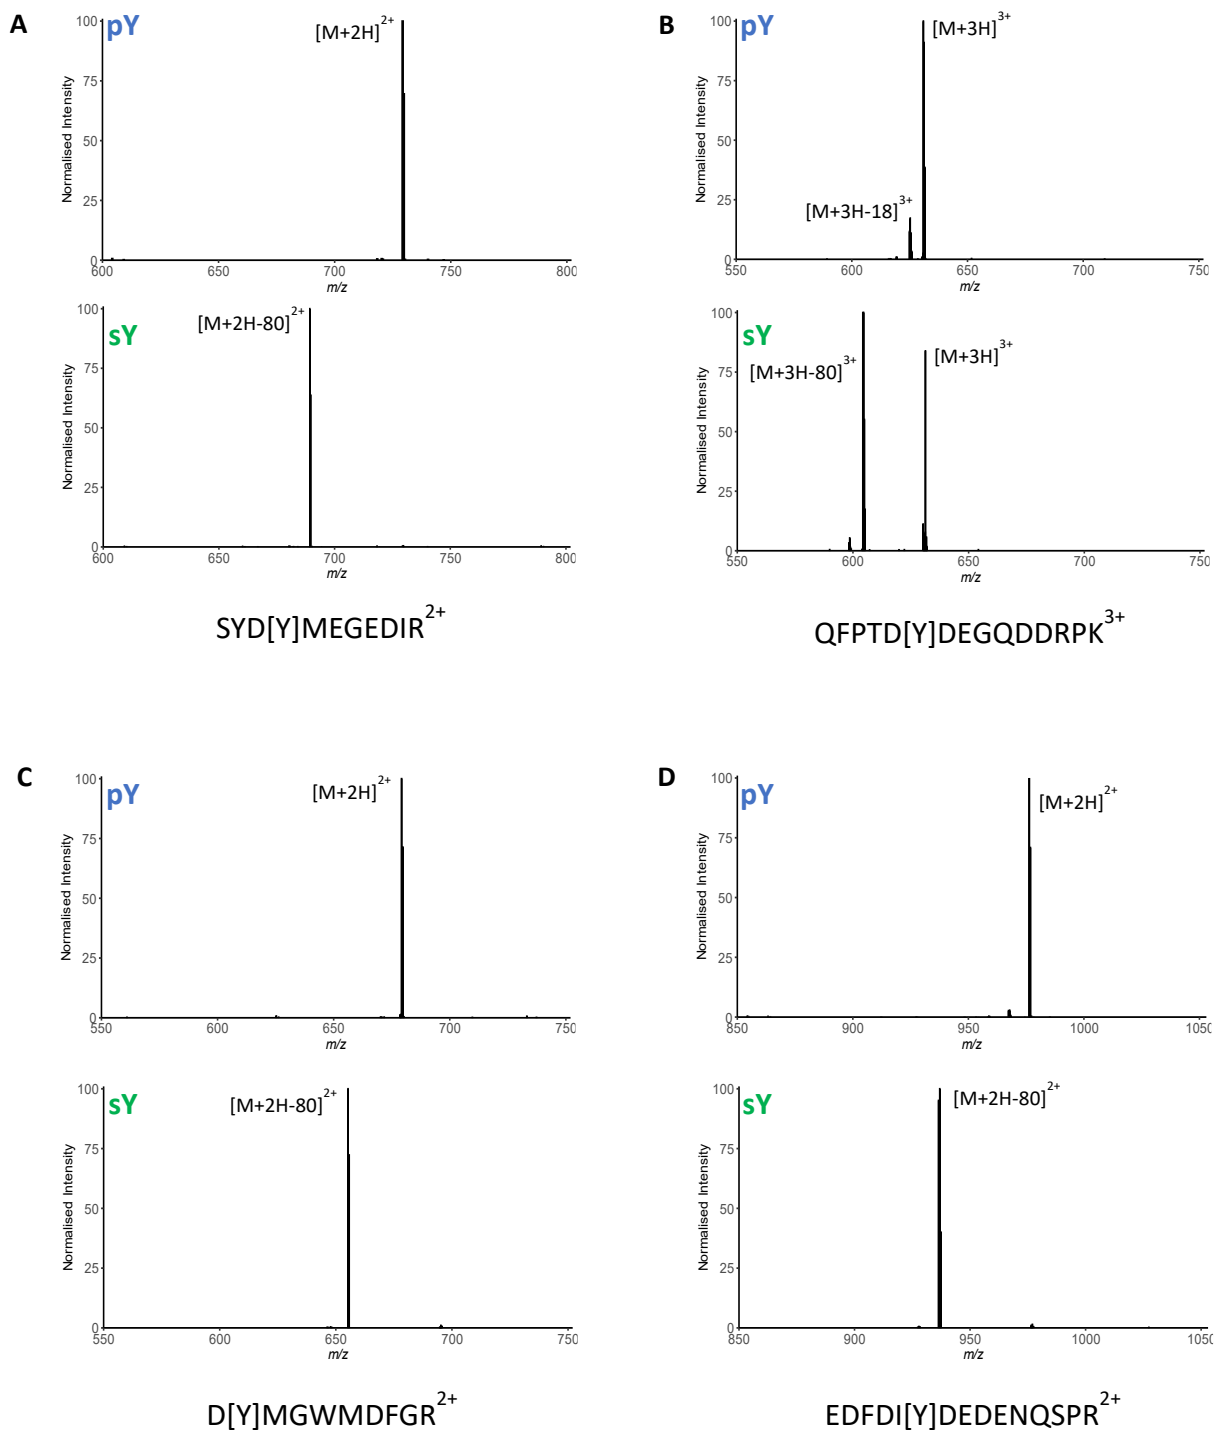

**Figure S2. Sulfated peptides but not phosphopeptides yield extensive precursor ion loss of 80 amu following 10% NCE HCD fragmentation.** MS2 spectra of identical peptide sequences containing either sY (bottom) or pY (top) were subjected to HCD fragmentation using 10% NCE. A) doubly protonated SYD[Y]MEGEDIR ion at  $m/z$  729.3; B) triply protonated QFPTD[Y]DEGQDDRPK ion at  $m/z$  630.9; C) doubly protonated D[Y]MGWMDGFR ion at  $m/z$  679.2; D) doubly protonated EDFDI[Y]DEDENQSPR ion at  $m/z$  976.4. Spectra were redrawn using a custom R script from the .mgf file and major peaks annotated.

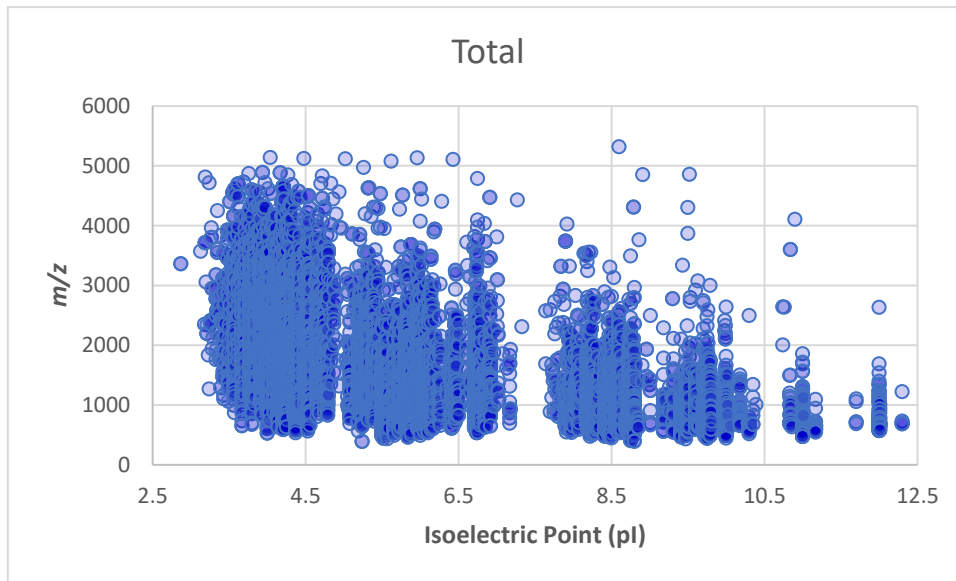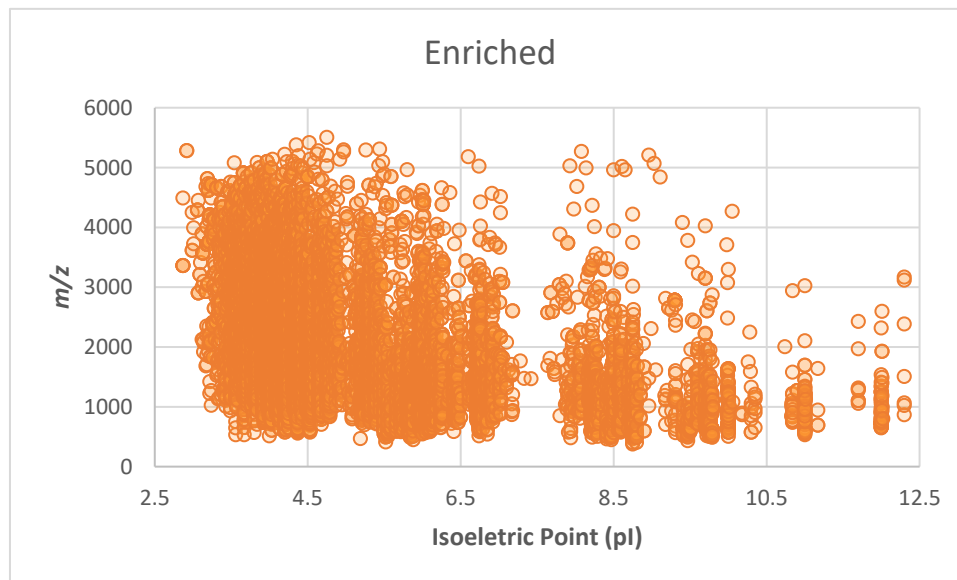

**Figure S3. Isoelectric point versus  $m/z$  distribution of the peptides identified from either the total DDA unenriched HEK-293 secretome sample (top; blue), or following enrichment with  $\text{TiO}_2$  or  $\text{Zr}^{4+}$  IMAC (bottom; orange).  $m/z$  data was extracted from PEAKS11 analysis. Identified peptide sequences were input into the ExPASy compute\_pi tool to determine pI ([https://web.expasy.org/compute\\_pi/](https://web.expasy.org/compute_pi/)) [accessed June 2023].**

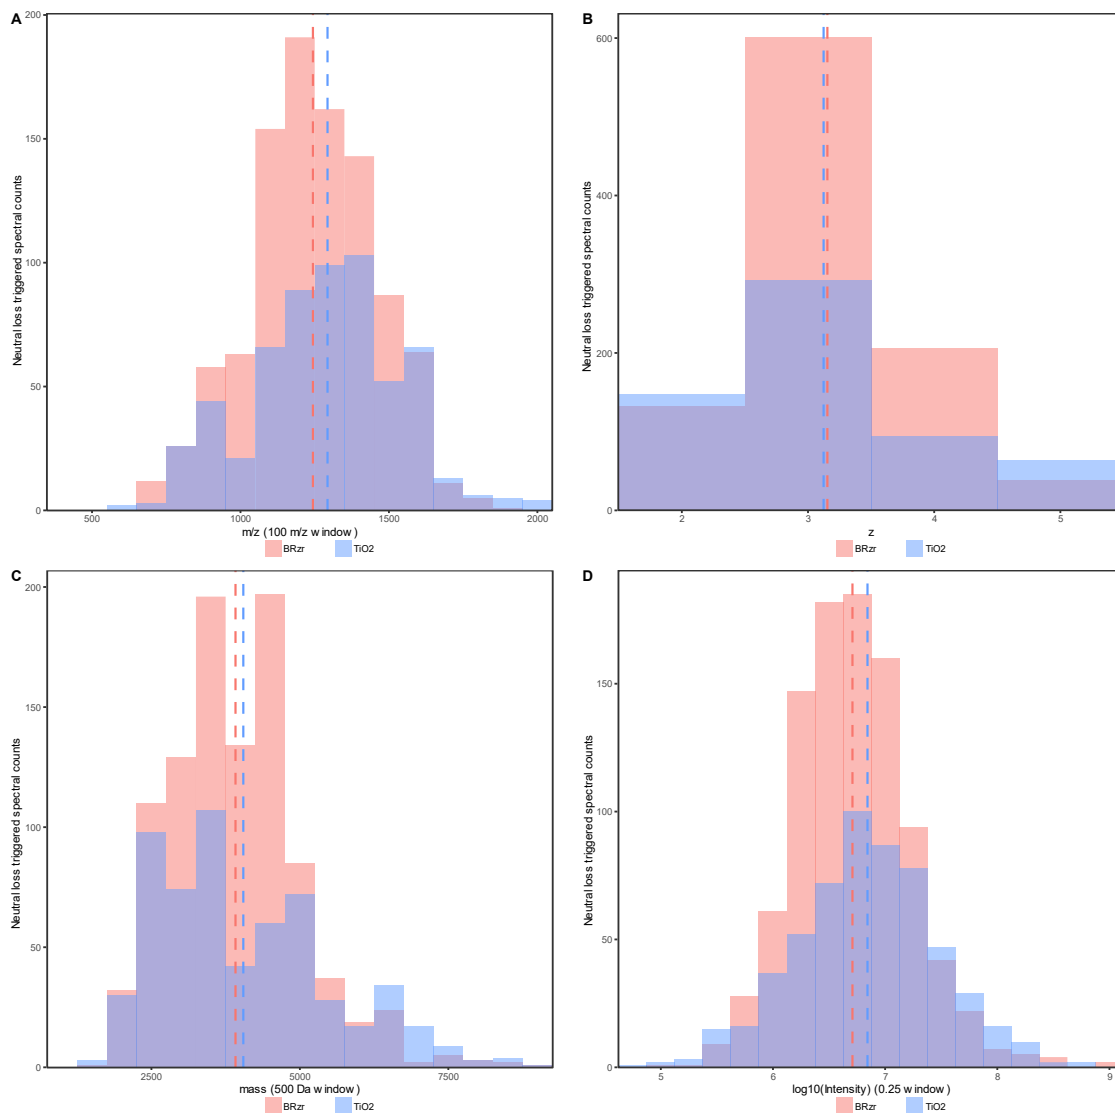

**Figure S4. Characteristics of precursor ions that triggered 32% NCE HCD following precursor ion NL at 10% NCE HCD following secretome peptide enrichment with either BioResyn Zr<sup>4+</sup>-IMAC (BRzr) or TiO<sub>2</sub>.** The number of neutral loss triggered spectral counts is plotted for the two enriched samples (BioResyn Zr<sup>4+</sup>-IMAC HP (red) or TiO<sub>2</sub> (blue)) as a function of: A) Precursor ion  $m/z$  in 100  $m/z$  windows. B) Precursor ion charge state. C) Precursor mass in 500 Da windows. D) Precursor  $\log_{10}(\text{intensity})$  in 0.25 windows. Data were extracted from .mgf files where the MSconvert “HCD energy = 32” filter was set to specifically identify triggered scans.

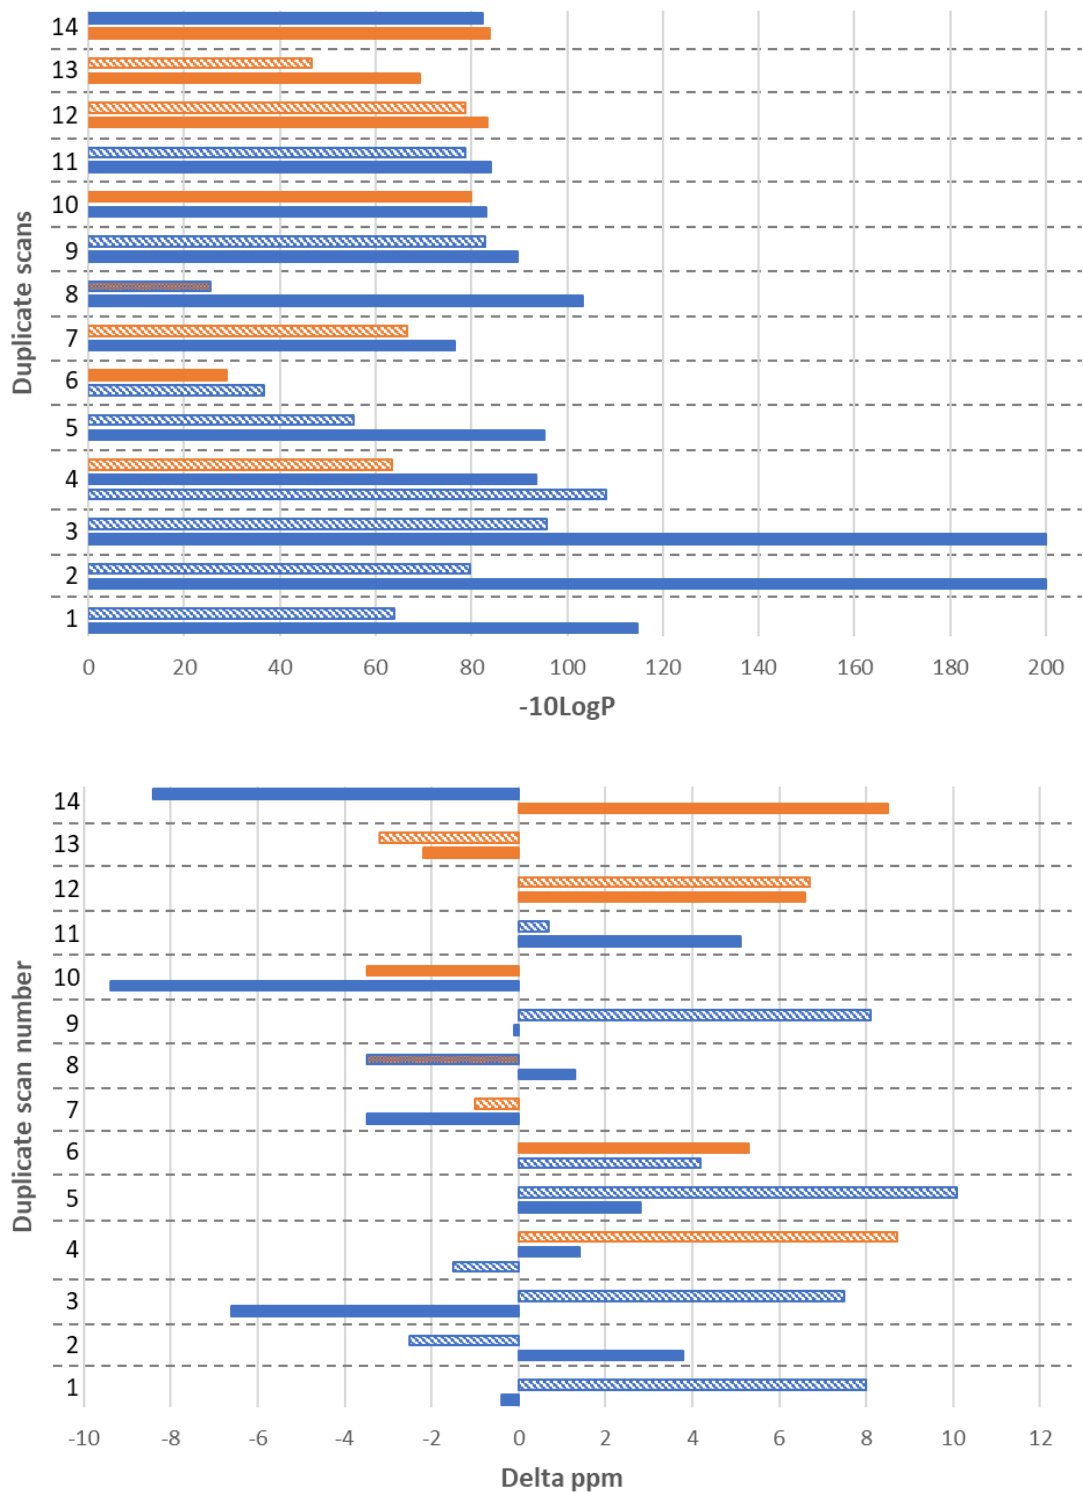

**Figure S5. Distinguishing duplicated scan PSMs.**  $-10\text{LogP}$  value (top) and  $\Delta\text{ppm}$  (bottom) for 14 representative duplicate scans from the neutral loss triggered enriched dataset with different PTMs assigned to the same peptide sequence. Sulfation - blue; phosphorylation – orange; deamidation – check boxes. Better score often, but does not always, correlate with a lower  $\Delta\text{ppm}$ .

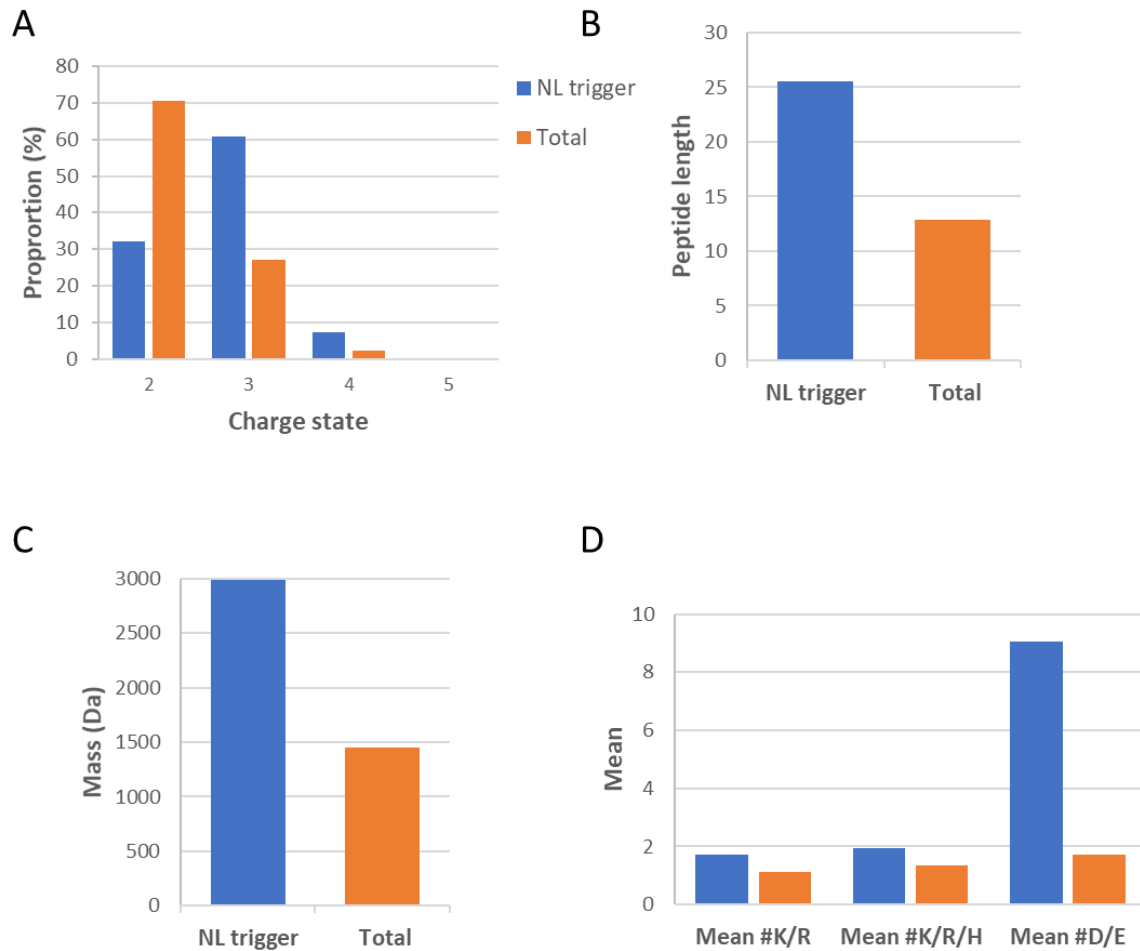

**Figure S6. Properties of peptides from enriched HEK293 secretome.** All non-duplicated PSMs from either the neutral loss triggered enriched (blue) or the total unenriched protein DDA (orange) analyses were interrogated for (A) charge state; (B) peptide length; (C) average mass; (D) average (mean) number of K/R/H or D/E residues per peptide. All data was extracted from the PEAKS11 output.

|          |         | SO <sub>3</sub> <sup>-</sup> |                             |
|----------|---------|------------------------------|-----------------------------|
| hHS6OST1 | GRVPTED | Y <sup>403</sup>             | MSHIIEKW-CO <sub>2</sub> H  |
| hHS6OST2 | TSNGTND | Y <sup>597</sup>             | IGSV-EKWR-CO <sub>2</sub> H |
| hHS6OST3 | EGTVTED | Y <sup>464</sup>             | N-SQVVRW-CO <sub>2</sub> H  |
| mHS6OST1 | GRVPTED | Y <sup>403</sup>             | MSHIIEKW-CO <sub>2</sub> H  |
| zHS6OST1 | SRLPTED | Y <sup>405</sup>             | MNHIINRW-CO <sub>2</sub> H  |
| mHS6OST2 | TSNGTND | Y <sup>604</sup>             | IGSV-ETWR-CO <sub>2</sub> H |
| zHS6OST2 | DGEIMLD | Y <sup>460</sup>             | LENV-EQWR-CO <sub>2</sub> H |
| mHS6OST3 | EGTVTED | Y <sup>463</sup>             | N-SQVVRW-CO <sub>2</sub> H  |
| zHS6OST3 | RVTTED  | Y <sup>412</sup>             | A-SQVVRW-CO <sub>2</sub> H  |

**Figure S7.** Sequence conservation (shaded) of a biochemically/MS-validated sulfated Tyr residue (Table S5) that lies C-terminal to an acidic motif in the C-terminus of human (h) Heparan Sulfate 6OST1, 2 and 3. The aligned sequence of the equivalent C-terminal region from mouse (m) and zebrafish (z) is also shown.



| Condition              | Gene name                                 | Protein name                           | % Coverage | Mascot Score                 | Sulfopeptide Sequence                  | Region in protein | Ion Score |
|------------------------|-------------------------------------------|----------------------------------------|------------|------------------------------|----------------------------------------|-------------------|-----------|
| H6ST1 no TPST1/2 (DDA) | HS6ST1                                    | Heparan-sulfate 6-O-sulfotransferase 1 | 52         | 1530                         |                                        |                   |           |
|                        | HS6T3                                     | Heparan-sulfate 6-O-sulfotransferase 3 | 22         | 548                          |                                        |                   |           |
| H6ST1 +TPST1/2 (DDA)   | HS6ST1                                    | Heparan-sulfate 6-O-sulfotransferase 1 | 59         | 1599                         | EDADEPGRVPTED <u>Y</u> MSHII EK        | 390-410           | 44        |
|                        |                                           |                                        |            |                              | EDADEPGRVPTED <u>Y</u> MSHII EKW       | 390-411           | 28        |
|                        | HS6T3                                     | Heparan-sulfate 6-O-sulfotransferase 3 | 9          | 381                          |                                        |                   |           |
| H6ST1 + TPST1/2 (NL)   | HS6ST1                                    | Heparan-sulfate 6-O-sulfotransferase 1 | 7          | 120                          | EDADEPGRVPTED <u>Y</u> MSHII EK        | 390-410           | 59        |
|                        |                                           |                                        |            |                              | EDADEPGRVPTED <u>Y</u> MSHII EKW       | 390-411           | 51        |
|                        |                                           |                                        |            |                              | EDADEPGRVPTED <u>Y</u> MSHII EKW       | 390-411           | 27        |
| TPST1                  | Protein-tyrosine sulfotransferase 1       | 9                                      | 61         | LG <u>Y</u> DPYANPPNYGKPD PK | 324-341                                | 52                |           |
| H6ST2 no TPST1/2 (DDA) | HS6ST2                                    | Heparan-sulfate 6-O-sulfotransferase 2 | 30         | 627                          |                                        |                   |           |
|                        | HS6ST3                                    | Heparan-sulfate 6-O-sulfotransferase 3 | 19         | 197                          |                                        |                   |           |
| H6ST2 + TPST1/2 (DDA)  | HS6ST2                                    | Heparan-sulfate 6-O-sulfotransferase 2 | 43         | 1395                         | EQNDNTSNGTND <u>Y</u> IGSVEK           | 585-603           | 95        |
|                        | GEMIN5                                    | Gem-associated protein 5               | 1          | 32                           | V <u>Y</u> EAVELLK                     | 991-999           | 32        |
|                        | TPST1                                     | Protein-tyrosine sulfotransferase 1    | 53         | 2821                         | LG <u>Y</u> DPYANPPNYGKPD PK           | 324-341           | 48        |
| H6ST2 + TPST1/2 (NL)   | HS6ST2                                    | Heparan-sulfate 6-O-sulfotransferase 2 | 3          | 105                          | EQNDNTSNGTND <u>Y</u> IGSVEK           | 585-603           | 106       |
|                        | TPST1                                     | Protein-tyrosine sulfotransferase 1    | 5          | 83                           | LG <u>Y</u> DPYANPPNYGKPD PK           | 324-341           | 42        |
|                        | TUBA1A                                    | Tubulin alpha-1A chain                 | 6          | 48                           | EDMAALEKD <u>Y</u> EEVGVDSVEGEGEEEGEEY | 423-451           | 48        |
| H6ST3 + TPST1/2 (DDA)  | HS6ST3                                    | Heparan-sulfate 6-O-sulfotransferase 3 | 63         | 2453                         | SPTPDELPTC <u>Y</u> PGDDWSGVSLR        | 275-296           | 42        |
|                        |                                           |                                        |            |                              | EDGAAEGTVTED <u>Y</u> NSQVVR           | 452-470           | 59        |
|                        |                                           |                                        |            |                              | DHQWPKEDGAAEGTVTED <u>Y</u> NSQVVR     | 446-470           | 71        |
|                        | TPST2                                     | Protein-tyrosine sulfotransferase 2    | 60         | 3709                         | VLKGD <u>Y</u> K                       | 348-354           | 33        |
|                        | TUBA1B                                    | Tubulin alpha-1B chain                 | 65         | 1713                         | LSVD <u>Y</u> GKK                      | 157-164           | 30        |
|                        |                                           |                                        |            |                              | EDMAALEKD <u>Y</u> EEVGVDSVEGEGEEEGEEY | 423-451           | 44        |
|                        | TUBA1C                                    | Tubulin alpha-1C chain                 | 60         | 1249                         | LSVD <u>Y</u> GKK                      | 157-164           | 30        |
| HNRNPH1                | Heterogeneous nuclear ribonucleoprotein H | 22                                     | 225        | DLN <u>Y</u> CFSGMSDHR       | 263-275                                | 31                |           |
| H6ST3 + TPST1/2 (NL)   | HS6ST3                                    | Heparan-sulfate 6-O-sulfotransferase 3 | 10         | 475                          | DHQWPKEDGAAEGTVTED <u>Y</u> NSQVVR     | 446-470           | 104       |
|                        |                                           |                                        |            |                              | EDGAAEGTVTED <u>Y</u> NSQVVR           | 452-470           | 77        |
|                        |                                           |                                        |            |                              | SPTPDELPTC <u>Y</u> PGDDWSGVSLR        | 275-296           | 43        |
|                        | IRS4                                      | Insulin receptor substrate 4           | 1          | 128                          | EADSSSD <u>Y</u> VNMDFTK               | 914-928           | 49        |
|                        |                                           |                                        |            |                              | EADSSSD <u>Y</u> VNMDFTKR              | 914-929           | 97        |
|                        | TUBB                                      | Tubulin beta chain                     | 8          | 108                          | ISV <u>Y</u> NEATGGK                   | 47-58             | 65        |
|                        |                                           |                                        |            |                              | NSS <u>Y</u> FVEWIPNNVK                | 337-350           | 59        |
|                        | TUBA1A                                    | Tubulin alpha-1A chain                 | 8          | 69                           | EDMAALEKD <u>Y</u> EEVGVDSVEGEGEEEGEEY | 423-451           | 50        |
|                        |                                           |                                        |            |                              | LSVD <u>Y</u> GKK                      | 157-164           | 39        |
|                        | TPST1                                     | Protein-tyrosine sulfotransferase 1    | 5          | 55                           | LG <u>Y</u> DPYANPPNYGKPD PK           | 324-341           | 47        |
| HNRNPH1                | Heterogeneous nuclear ribonucleoprotein H | 3                                      | 43         | DLN <u>Y</u> CFSGMSDHR       | 263-275                                | 43                |           |

**Table S5. Proteins and sulfopeptides identified following in vitro sulfation of immunoprecipitated H6ST1, H6ST2 or H6ST3 with TPST1/2.** H6ST1, H6ST2 or H6ST3 were overexpressed in HEK-293 cells, immunoprecipitated and subjected to *in vitro* sulfation with TPST1/2. Samples were digested with trypsin and subjected LC-MS/MS analysis, using either data-dependent acquisition (DDA) or the low energy (10% NCD HCD) neutral loss (NL) triggering strategy. Detailed are the conditions for the assay, identified proteins of interest, protein sequence coverage (%) and Mascot score, sulfopeptide sequence, region in the protein and peptide score. Putative site of sulfation in the peptide sequence is underlined. No modified peptides were observed in the absence of TPST1/2.
